# Supplementary material for: An epitope tag alters phosphoglycerate dehydrogenase structure and impairs ability to support cell proliferation
Source: PubMed Central journal article supplement (PMC4414297; doi:10.1186/s40170-015-0131-7), 2015-04-29

A

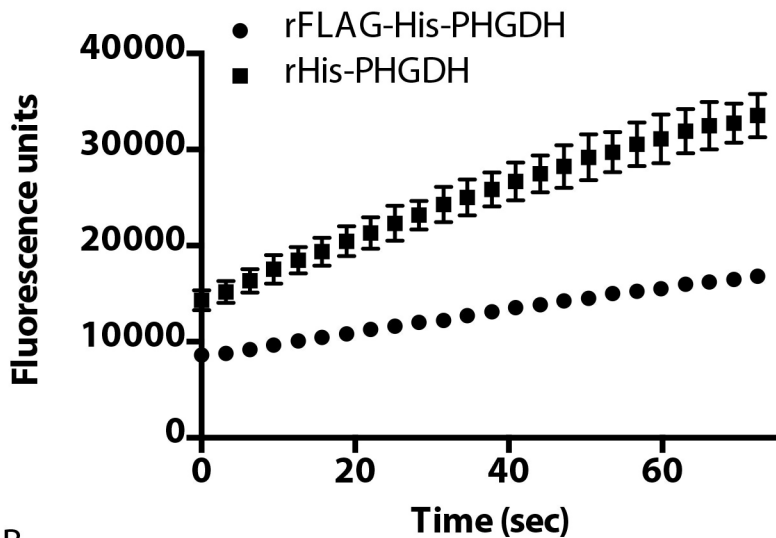

B

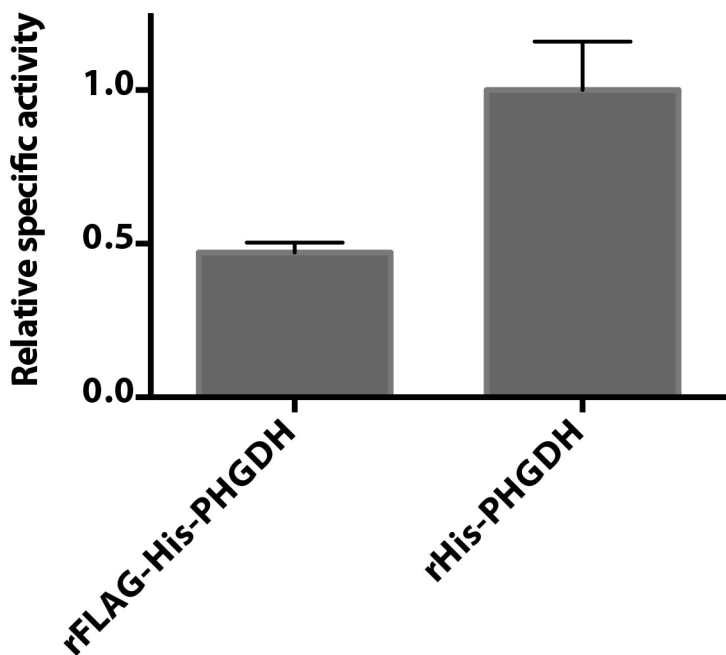

Supplement: 40170_2015_131_MOESM2_ESM.pdf [file 40170_2015_131_MOESM2_ESM.pdf]
